# Supplementary material for: Highly water-soluble dimeric and trimeric lanthanide carbonates with ethylenediaminetetraacetates as precursors of catalysts for the oxidative coupling reaction of methane
Source: Royal Society of Chemistry journal article supplement (doi:10.1039/d1nj05608e), 2022-01-01
Supplement: d1nj05608e1.pdf [file d1nj05608e1.pdf]

## Supporting information

### Highly water-soluble dimeric and trimeric lanthanide carbonates with ethylenediaminetetraacetates as precursors of catalysts for oxidative coupling reaction of methane

Rong-Yan Lin, Yan-Ru Shi, Yu-Hui Hou, Wen-Sheng Xia, Wei-Zheng Weng, Zhao-Hui Zhou\*

*State Key Laboratory of Physical Chemistry of Solid Surfaces and Department of Chemistry, College of Chemistry and Chemical Engineering, Xiamen University, Xiamen, 361005, China, Tel: + 86-592-2184531; Fax: + 86-592-2183047 zhzhou@xmu.edu.cn*

#### Figures and Table Options

|                                                                                                                                                                                                              |    |
|--------------------------------------------------------------------------------------------------------------------------------------------------------------------------------------------------------------|----|
| <b>Fig. S1.</b> Anion structure of trimeric complex $(\text{NH}_4)_5[\text{La}_3(\text{CO}_3)(\text{EDTA})_3(\text{H}_2\text{O})_3] \cdot 12\text{H}_2\text{O}$ ( <b>1</b> ) in 30% thermal ellipsoids. .... | 3  |
| <b>Fig. S2.</b> Anion structure of dimeric complex $\text{Na}_8[\text{Ce}_2(\text{CO}_3)_3(\text{EDTA})_2] \cdot 17.5\text{H}_2\text{O}$ ( <b>3</b> ) in 30% thermal ellipsoids.....                         | 3  |
| <b>Fig. S3.</b> Anion structure of trimeric complex $\text{K}_5[\text{Ce}_3(\text{CO}_3)(\text{EDTA})_3(\text{H}_2\text{O})_3] \cdot 13.5\text{H}_2\text{O}$ ( <b>5</b> ) in 30% thermal ellipsoids. ....    | 4  |
| <b>Fig. S4.</b> $^1\text{H}$ NMR spectrum of $(\text{NH}_4)_5[\text{La}_3(\text{CO}_3)(\text{EDTA})_3(\text{H}_2\text{O})_3] \cdot 12\text{H}_2\text{O}$ ( <b>1</b> ). ....                                  | 4  |
| <b>Fig. S5.</b> $^1\text{H}$ NMR spectrum of $\text{Na}_8[\text{La}_2(\text{CO}_3)_3(\text{EDTA})_2] \cdot 17.5\text{H}_2\text{O}$ ( <b>2</b> ). ....                                                        | 5  |
| <b>Fig. S6.</b> $^1\text{H}$ NMR spectrum of $\text{K}_5[\text{La}_3(\text{CO}_3)(\text{EDTA})_3(\text{H}_2\text{O})_3] \cdot 13.5\text{H}_2\text{O}$ ( <b>4</b> ). ....                                     | 5  |
| <b>Fig. S7.</b> $^1\text{H}$ NMR spectrum of $\text{K}_4\text{EDTA}$ . ....                                                                                                                                  | 6  |
| <b>Fig. S8.</b> $^1\text{H}$ NMR spectrum of $\text{K}[\text{La}(\text{EDTA})(\text{H}_2\text{O})_3] \cdot 5\text{H}_2\text{O}$ . ....                                                                       | 6  |
| <b>Fig. S9.</b> Solution $^{13}\text{C}$ NMR spectrum of $(\text{NH}_4)_5[\text{La}_3(\text{CO}_3)(\text{EDTA})_3(\text{H}_2\text{O})_3] \cdot 12\text{H}_2\text{O}$ ( <b>1</b> ). ....                      | 7  |
| <b>Fig. S10.</b> Solution $^{13}\text{C}$ NMR spectrum of $\text{Na}_8[\text{La}_2(\text{CO}_3)_3(\text{EDTA})_2] \cdot 17.5\text{H}_2\text{O}$ ( <b>2</b> ). ....                                           | 7  |
| <b>Fig. S11.</b> Solution $^{13}\text{C}$ NMR spectrum of $\text{K}_5[\text{La}_3(\text{CO}_3)(\text{EDTA})_3(\text{H}_2\text{O})_3] \cdot 13.5\text{H}_2\text{O}$ ( <b>4</b> ). ....                        | 8  |
| <b>Fig. S12.</b> Solution $^{13}\text{C}$ NMR spectrum of $(\text{NH}_4)_2\text{CO}_3$ . ....                                                                                                                | 8  |
| <b>Fig. S13.</b> Solution $^{13}\text{C}$ NMR spectrum of $(\text{NH}_4)_2\text{CO}_3$ in dimethylformamide-water. ....                                                                                      | 9  |
| <b>Fig. S14.</b> Solution $^{13}\text{C}$ NMR spectrum of $\text{Na}_2\text{CO}_3$ . ....                                                                                                                    | 9  |
| <b>Fig. S15.</b> Solution $^{13}\text{C}$ NMR spectrum of $\text{Na}_2\text{CO}_3$ in dimethylformamide-water. ....                                                                                          | 10 |
| <b>Fig. S16.</b> Solution $^{13}\text{C}$ NMR spectrum of $\text{K}_2\text{CO}_3$ . ....                                                                                                                     | 10 |

|                                                                                                                                                                                                                                                                                                                                                                                                                                                                                                                                                                                                                                                                                                                                                                                                                                                                  |    |
|------------------------------------------------------------------------------------------------------------------------------------------------------------------------------------------------------------------------------------------------------------------------------------------------------------------------------------------------------------------------------------------------------------------------------------------------------------------------------------------------------------------------------------------------------------------------------------------------------------------------------------------------------------------------------------------------------------------------------------------------------------------------------------------------------------------------------------------------------------------|----|
| <b>Fig. S17.</b> Solution $^{13}\text{C}$ NMR spectrum of $\text{K}_2\text{CO}_3$ in dimethylformamide-water. ....                                                                                                                                                                                                                                                                                                                                                                                                                                                                                                                                                                                                                                                                                                                                               | 11 |
| <b>Fig. S18.</b> Solution $^{13}\text{C}$ NMR spectrum of DMF. ....                                                                                                                                                                                                                                                                                                                                                                                                                                                                                                                                                                                                                                                                                                                                                                                              | 11 |
| <b>Fig. S19.</b> IR spectrum of $(\text{NH}_4)_5[\text{La}_3(\text{CO}_3)(\text{EDTA})_3(\text{H}_2\text{O})_3] \cdot 12\text{H}_2\text{O}$ ( <b>1</b> ). ....                                                                                                                                                                                                                                                                                                                                                                                                                                                                                                                                                                                                                                                                                                   | 12 |
| <b>Fig. S20.</b> IR spectrum of $\text{Na}_8[\text{La}_2(\text{CO}_3)_3(\text{EDTA})_2] \cdot 17.5\text{H}_2\text{O}$ ( <b>2</b> ). ....                                                                                                                                                                                                                                                                                                                                                                                                                                                                                                                                                                                                                                                                                                                         | 12 |
| <b>Fig. S21.</b> IR spectrum of $\text{Na}_8[\text{Ce}_2(\text{CO}_3)_3(\text{EDTA})_2] \cdot 17.5\text{H}_2\text{O}$ ( <b>3</b> ). ....                                                                                                                                                                                                                                                                                                                                                                                                                                                                                                                                                                                                                                                                                                                         | 13 |
| <b>Fig. S22.</b> IR spectrum of $\text{K}_5[\text{La}_3(\text{CO}_3)(\text{EDTA})_3(\text{H}_2\text{O})_3] \cdot 13.5\text{H}_2\text{O}$ ( <b>4</b> ). ....                                                                                                                                                                                                                                                                                                                                                                                                                                                                                                                                                                                                                                                                                                      | 13 |
| <b>Fig. S23.</b> IR spectrum of $\text{K}_5[\text{Ce}_3(\text{CO}_3)(\text{EDTA})_3(\text{H}_2\text{O})_3] \cdot 13.5\text{H}_2\text{O}$ ( <b>5</b> ). ....                                                                                                                                                                                                                                                                                                                                                                                                                                                                                                                                                                                                                                                                                                      | 14 |
| <b>Fig. S24.</b> TG-DTG curve of $(\text{NH}_4)_5[\text{La}_3(\text{CO}_3)(\text{EDTA})_3(\text{H}_2\text{O})_3] \cdot 12\text{H}_2\text{O}$ ( <b>1</b> ). ....                                                                                                                                                                                                                                                                                                                                                                                                                                                                                                                                                                                                                                                                                                  | 14 |
| <b>Fig. S25.</b> TG-DTG curve of $\text{Na}_8[\text{La}_2(\text{CO}_3)_3(\text{EDTA})_2] \cdot 17.5\text{H}_2\text{O}$ ( <b>2</b> ). ....                                                                                                                                                                                                                                                                                                                                                                                                                                                                                                                                                                                                                                                                                                                        | 15 |
| <b>Fig. S26.</b> TG-DTG curve of $\text{Na}_8[\text{Ce}_2(\text{CO}_3)_3(\text{EDTA})_2] \cdot 17.5\text{H}_2\text{O}$ ( <b>3</b> ). ....                                                                                                                                                                                                                                                                                                                                                                                                                                                                                                                                                                                                                                                                                                                        | 15 |
| <b>Fig. S27.</b> TG-DTG curve of $\text{K}_5[\text{La}_3(\text{CO}_3)(\text{EDTA})_3(\text{H}_2\text{O})_3] \cdot 13.5\text{H}_2\text{O}$ ( <b>4</b> ). ....                                                                                                                                                                                                                                                                                                                                                                                                                                                                                                                                                                                                                                                                                                     | 16 |
| <b>Fig. S28.</b> TG-DTG curve of $\text{K}_5[\text{Ce}_3(\text{CO}_3)(\text{EDTA})_3(\text{H}_2\text{O})_3] \cdot 13.5\text{H}_2\text{O}$ ( <b>5</b> ). ....                                                                                                                                                                                                                                                                                                                                                                                                                                                                                                                                                                                                                                                                                                     | 16 |
| <b>Fig. S29.</b> The X-ray diffraction patterns of the conventional bulk $\text{La}_2\text{O}_3$ (before and after catalytic reactions). ....                                                                                                                                                                                                                                                                                                                                                                                                                                                                                                                                                                                                                                                                                                                    | 17 |
| <b>Fig. S30.</b> Reaction of $\text{K}[\text{La}(\text{EDTA})(\text{H}_2\text{O})] \cdot 5\text{H}_2\text{O}$ with atmospheric $\text{CO}_2$ monitored by $^{13}\text{C}$ NMR. (a) The spectrum of the sample was recorded after 12 hours. (b) The spectrum of the sample was recorded after 1 day. (c) The spectrum of the sample was recorded after 2 days. (d) The spectrum of the sample was recorded after 4 days. ....                                                                                                                                                                                                                                                                                                                                                                                                                                     | 17 |
| <b>Table S1.</b> Crystal data and structure refinements for <b>1</b> ~ <b>5</b> . ....                                                                                                                                                                                                                                                                                                                                                                                                                                                                                                                                                                                                                                                                                                                                                                           | 18 |
| <b>Table S2.</b> Selected bond lengths for <b>1</b> ~ <b>5</b> and $\text{K}[\text{La}(\text{EDTA})(\text{H}_2\text{O})_3] \cdot 5\text{H}_2\text{O}$ , $\{[\text{La}(\text{EDTA})(\text{H}_2\text{O})_2]_n\}$ , $[\text{La}(\text{EDTA})(\text{H}_2\text{O})_3] \cdot 5\text{H}_2\text{O}$ , $\text{Na}[\text{Ce}(\text{EDTA})(\text{H}_2\text{O})_3] \cdot 5\text{H}_2\text{O}$ , $\text{N}_2\text{H}_5[\text{Ce}(\text{edta})(\text{H}_2\text{O})_3] \cdot 4\text{H}_2\text{O}$ , $[\text{La}(\text{CO}_3)(\text{OH})]_n$ , $\text{La}(\text{CO}_3)(\text{OH})$ , $\text{LaCl}(\text{CO}_3) \cdot 3\text{H}_2\text{O}$ , $\text{Na}_{12n}[\text{La}(\text{edta})\text{CO}_3]_{4n} \cdot 8n\text{NaCl} \cdot 4n\text{H}_2\text{O}$ , $\text{Na}_8[(\text{CO}_3)_3\text{Ce}]_2(\mu\text{-}\eta^2\text{-}\eta^2\text{-O}_2)_2 \cdot 12\text{H}_2\text{O}$ . .... | 19 |
| <b>Table S3.</b> Comparisons of C–O bond lengths in complexes <b>1</b> ~ <b>5</b> and $[\text{La}(\text{CO}_3)(\text{OH})]_n$ , $\text{La}(\text{CO}_3)(\text{OH})$ , $\text{LaCl}(\text{CO}_3) \cdot 3\text{H}_2\text{O}$ , $\text{Na}_{12n}[\text{La}(\text{edta})\text{CO}_3]_{4n} \cdot 8n\text{NaCl} \cdot 4n\text{H}_2\text{O}$ , $\text{Na}_8[(\text{CO}_3)_3\text{Ce}]_2(\mu\text{-}\eta^2\text{-}\eta^2\text{-O}_2)_2 \cdot 12\text{H}_2\text{O}$ , $\{[\text{La}_2(\text{HL})_2(\text{H}_2\text{O})_2(\text{CO}_3)](\text{H}_2\text{O})_7\}_\infty$ , $\{[\text{Ce}_2(\text{CO}_3)(\text{ox})_2(\text{H}_2\text{O})_2] \cdot 3\text{H}_2\text{O}\}_n$ , $\text{K}_2\text{CO}_3$ , free $\text{CO}_2$ . ....                                                                                                                                            | 20 |
| <b>Table S4.</b> $^{13}\text{C}$ NMR spectral data (in ppm) of complexes <b>1</b> , <b>2</b> , <b>4</b> , $\text{K}_2\text{CO}_3$ , $\text{K}_3\text{Hcit}$ , $\text{K}_4\text{EDTA}$ , $\text{K}_2\text{Hmal}$ , $\text{K}[\text{La}(\text{EDTA})(\text{H}_2\text{O})_3] \cdot 5\text{H}_2\text{O}$ . ....                                                                                                                                                                                                                                                                                                                                                                                                                                                                                                                                                      | 21 |
| <b>Table S5.</b> The coordination number and the selected average bond length for <b>1</b> ~ <b>5</b> and other lanthanide carbonate complexes ( $\text{O}_c$ are the coordinated O atoms by carbonate) . ....                                                                                                                                                                                                                                                                                                                                                                                                                                                                                                                                                                                                                                                   | 22 |
| <b>Table S6.</b> Comparisons of catalytic activity of the thermal decomposition products ( $T = 650\text{ }^\circ\text{C}$ and $750\text{ }^\circ\text{C}$ ) from <b>1</b> , <b>2</b> , reported $\text{La}_2\text{O}_3$ and $\text{La}_2\text{O}_2\text{CO}_3$ towards the OCM reaction. ....                                                                                                                                                                                                                                                                                                                                                                                                                                                                                                                                                                   | 23 |
| <b>Table S7.</b> Catalytic Performances of <b>1</b> , <b>2</b> and $\text{La}_2\text{O}_2\text{CO}_3\text{-H}$ , $\text{La}_2\text{O}_2\text{CO}_3\text{-P}$ , $\text{La}_2\text{O}_3$ , $\text{BaCO}_3/\text{LaOBr}$ , $\text{LaAlO}_3\text{-C}$ , $\text{La}_2\text{O}_2\text{CO}_3$ , $\text{La}_2\text{O}_2\text{SO}_4$ , $\text{La}_2\text{O}_3$ for OCM. ....                                                                                                                                                                                                                                                                                                                                                                                                                                                                                              | 23 |

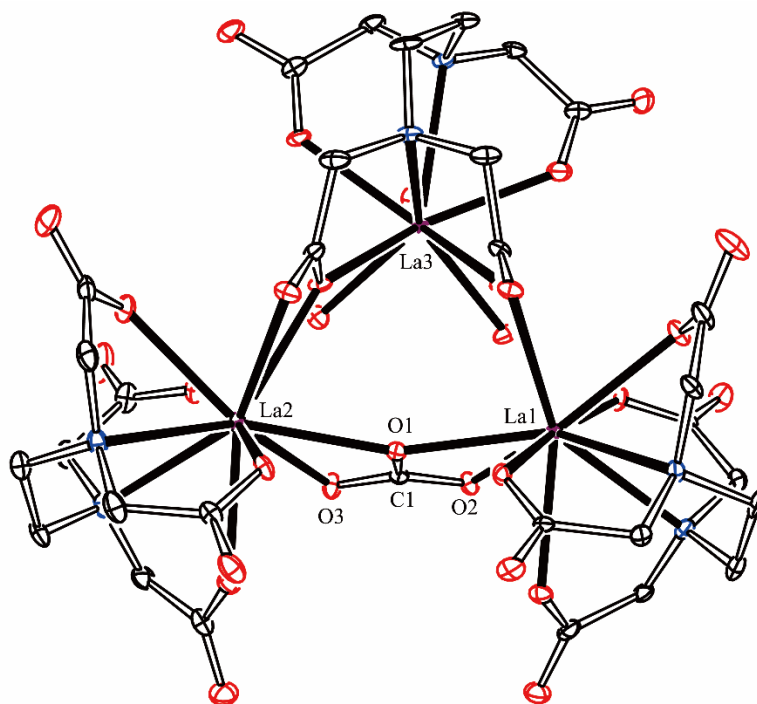

**Fig. S1.** Anion structure of trimeric complex  $(\text{NH}_4)_5[\text{La}_3(\text{CO}_3)(\text{EDTA})_3(\text{H}_2\text{O})_3] \cdot 12\text{H}_2\text{O}$  (**1**) in 30% thermal ellipsoids.

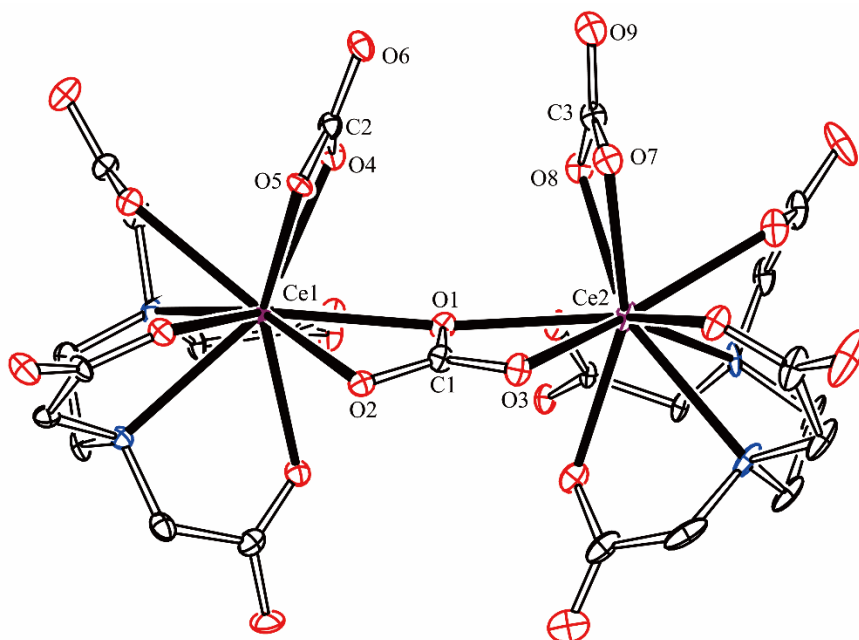

**Fig. S2.** Anion structure of dimeric complex  $\text{Na}_8[\text{Ce}_2(\text{CO}_3)_3(\text{EDTA})_2] \cdot 17.5\text{H}_2\text{O}$  (**3**) in 30% thermal ellipsoids.

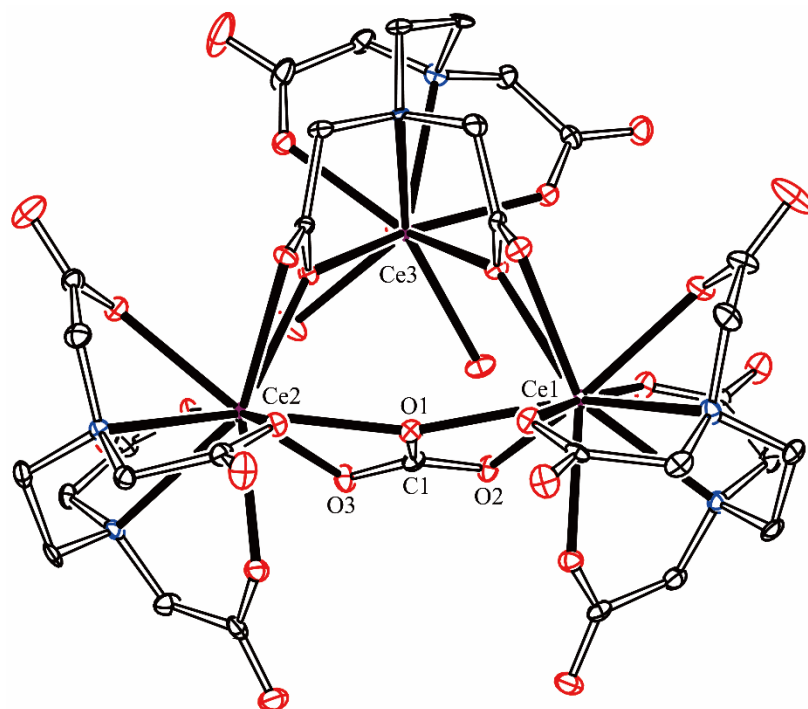

**Fig. S3.** Anion structure of trimeric complex  $\text{K}_5[\text{Ce}_3(\text{CO}_3)(\text{EDTA})_3(\text{H}_2\text{O})_3] \cdot 13.5\text{H}_2\text{O}$  (**5**) in 30% thermal ellipsoids.

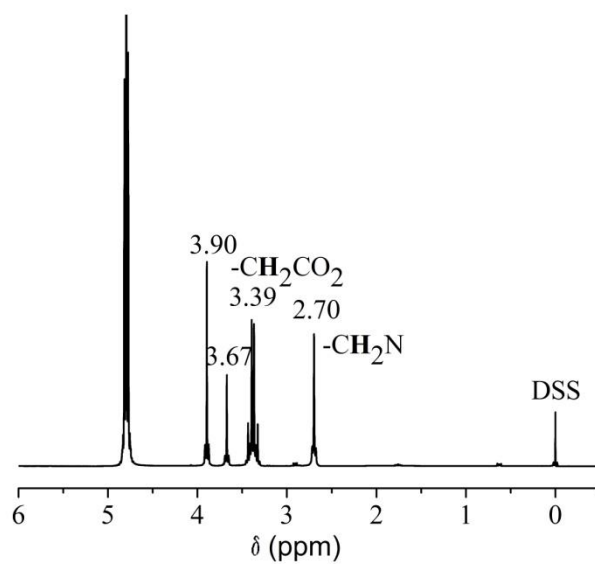

**Fig. S4.**  $^1\text{H}$  NMR spectrum of  $(\text{NH}_4)_5[\text{La}_3(\text{CO}_3)(\text{EDTA})_3(\text{H}_2\text{O})_3] \cdot 12\text{H}_2\text{O}$  (**1**).

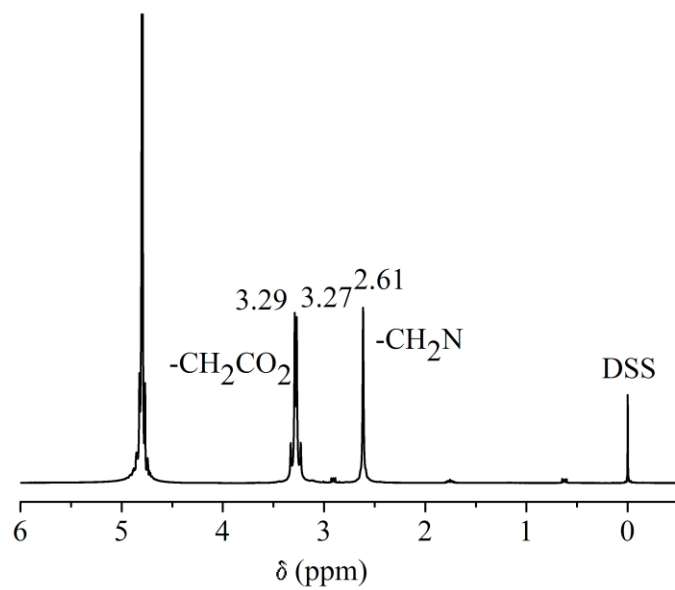

**Fig. S5.**  $^1\text{H}$  NMR spectrum of  $\text{Na}_8[\text{La}_2(\text{CO}_3)_3(\text{EDTA})_2] \cdot 17.5\text{H}_2\text{O}$  (2).

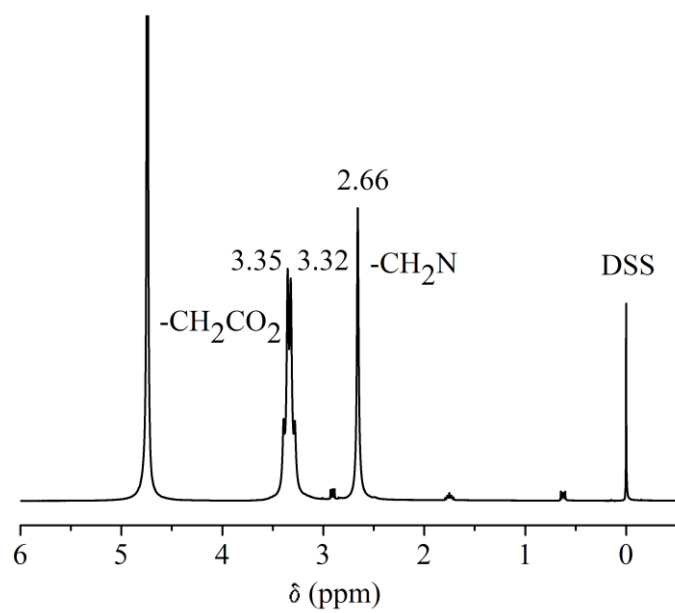

**Fig. S6.**  $^1\text{H}$  NMR spectrum of  $\text{K}_5[\text{La}_3(\text{CO}_3)(\text{EDTA})_3(\text{H}_2\text{O})_3] \cdot 13.5\text{H}_2\text{O}$  (4).

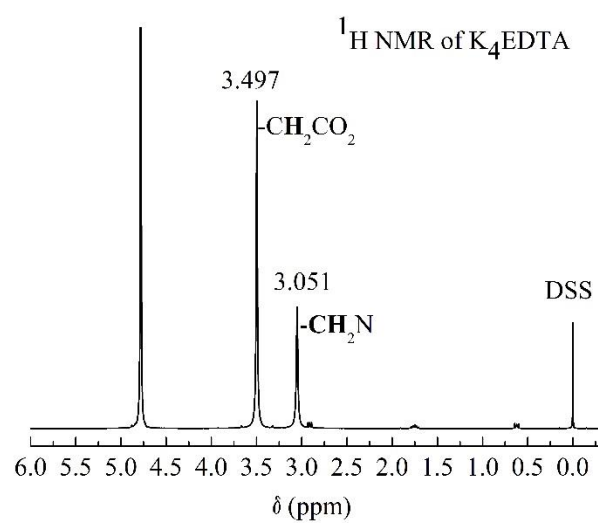

**Fig. S7.** <sup>1</sup>H NMR spectrum of K<sub>4</sub>EDTA.

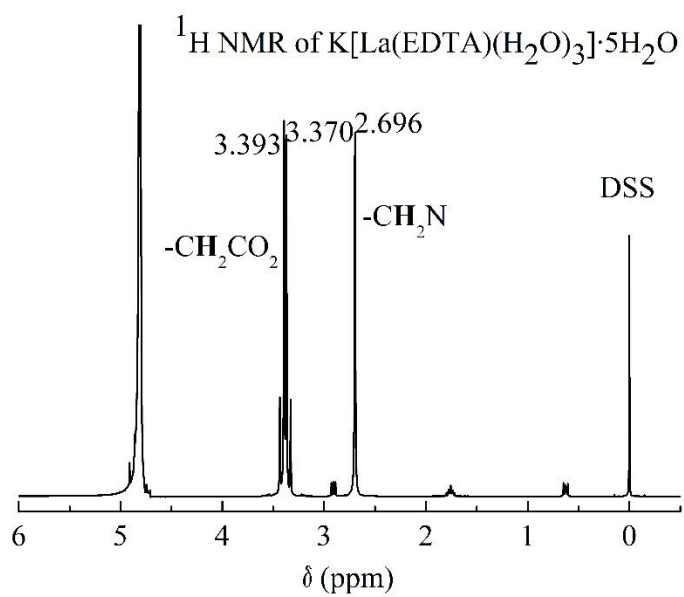

**Fig. S8.** <sup>1</sup>H NMR spectrum of K[La(EDTA)(H<sub>2</sub>O)<sub>3</sub>]·5H<sub>2</sub>O.

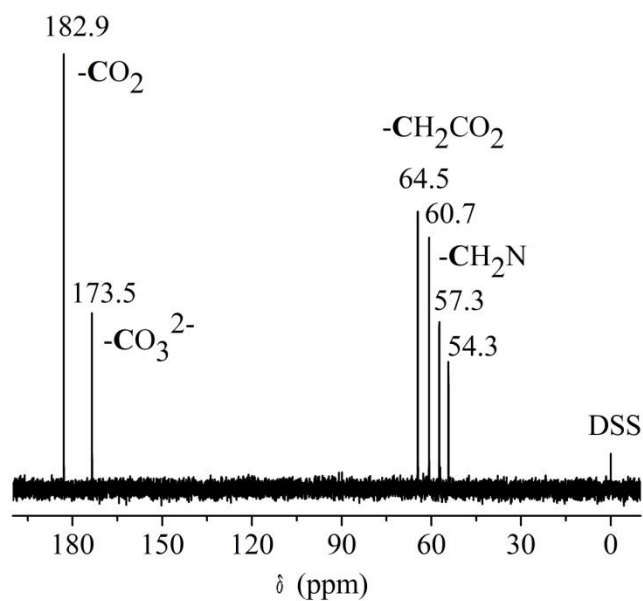

**Fig. S9.** Solution <sup>13</sup>C NMR spectrum of (NH<sub>4</sub>)<sub>5</sub>[La<sub>3</sub>(CO<sub>3</sub>)(EDTA)<sub>3</sub>(H<sub>2</sub>O)<sub>3</sub>] · 12H<sub>2</sub>O (**1**).

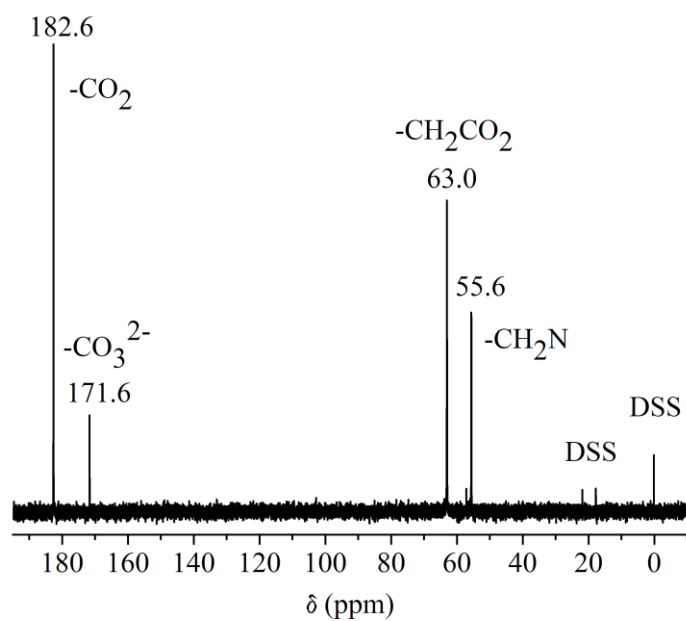

**Fig. S10.** Solution <sup>13</sup>C NMR spectrum of Na<sub>8</sub>[La<sub>2</sub>(CO<sub>3</sub>)<sub>3</sub>(EDTA)<sub>2</sub>] · 17.5H<sub>2</sub>O (**2**).

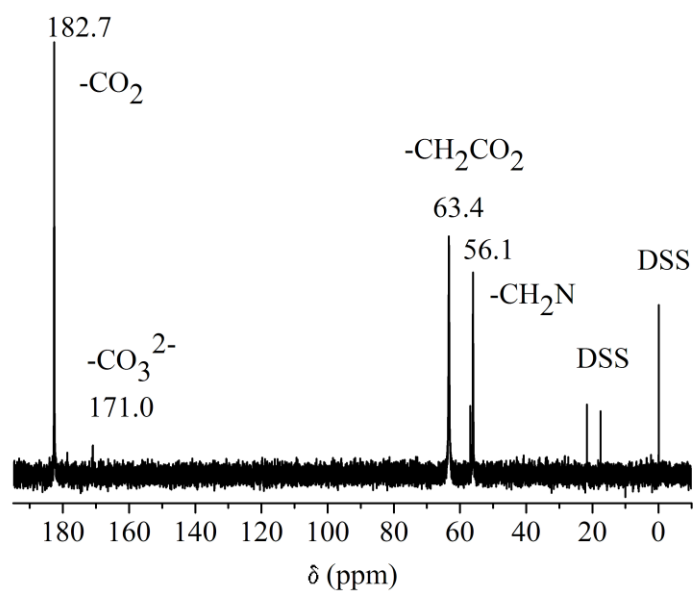

**Fig. S11.** Solution  $^{13}\text{C}$  NMR spectrum of  $\text{K}_5[\text{La}_3(\text{CO}_3)(\text{EDTA})_3(\text{H}_2\text{O})_3] \cdot 13.5\text{H}_2\text{O}$  (4).

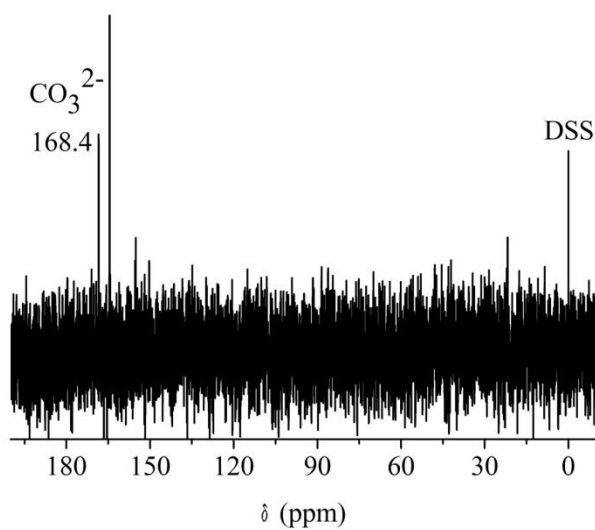

**Fig. S12.** Solution  $^{13}\text{C}$  NMR spectrum of  $(\text{NH}_4)_2\text{CO}_3$ .



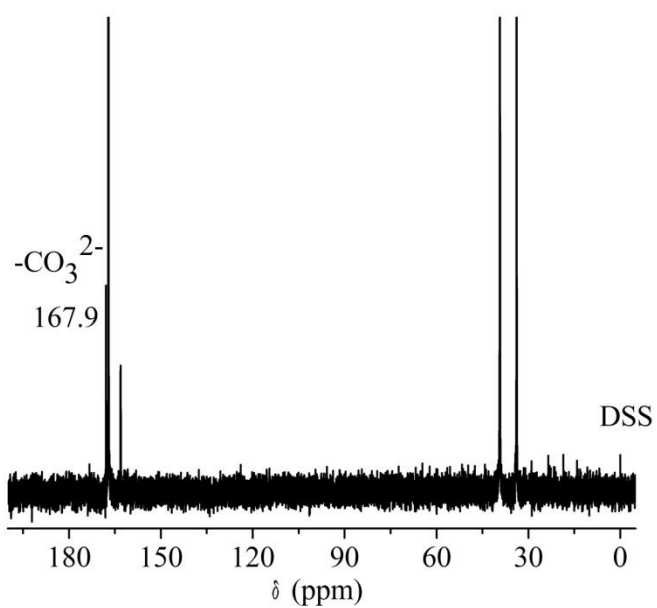

**Fig. S13.** Solution  $^{13}\text{C}$  NMR spectrum of  $(\text{NH}_4)_2\text{CO}_3$  in dimethylformamide-water.

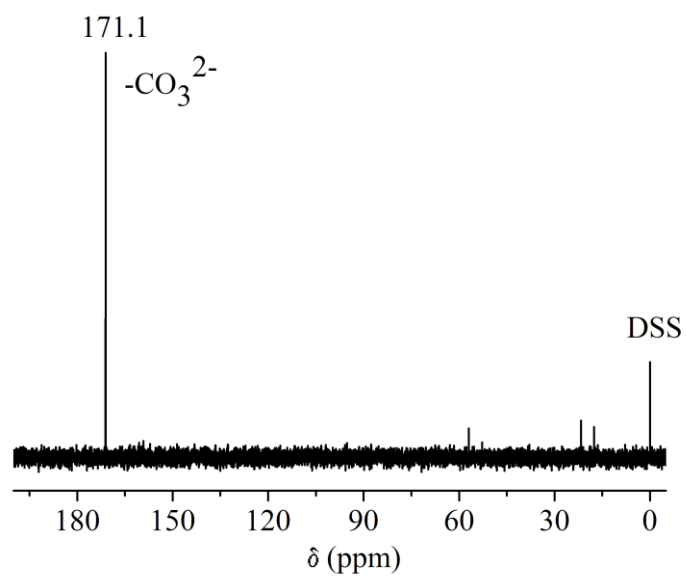

**Fig. S14.** Solution  $^{13}\text{C}$  NMR spectrum of  $\text{Na}_2\text{CO}_3$ .

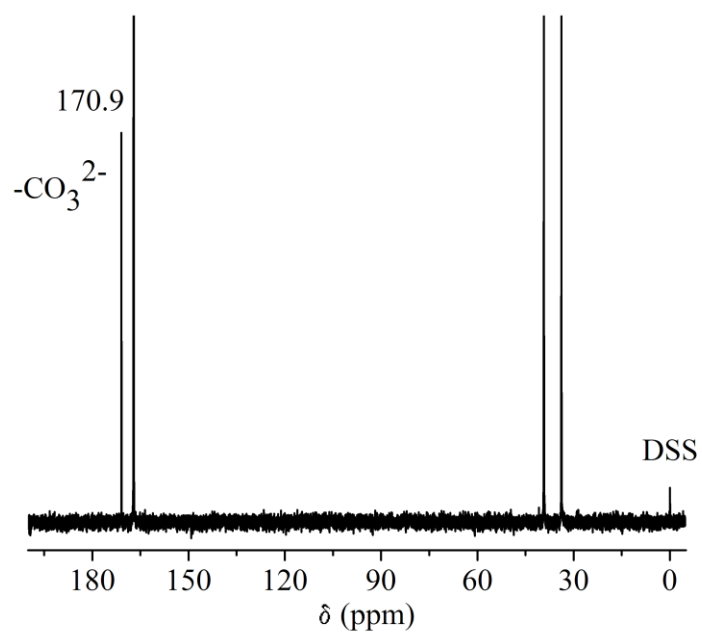

**Fig. S15.** Solution  $^{13}\text{C}$  NMR spectrum of  $\text{Na}_2\text{CO}_3$  in dimethylformamide-water.

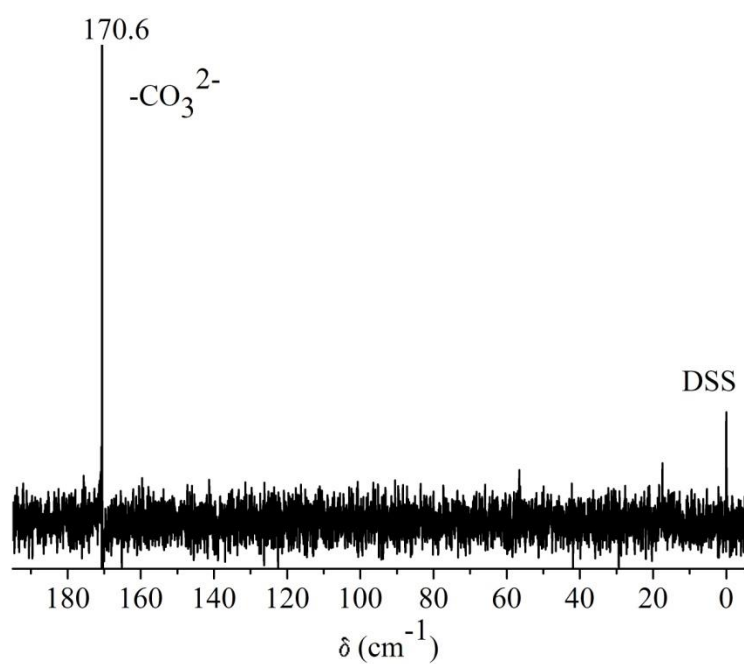

**Fig. S16.** Solution  $^{13}\text{C}$  NMR spectrum of  $\text{K}_2\text{CO}_3$ .

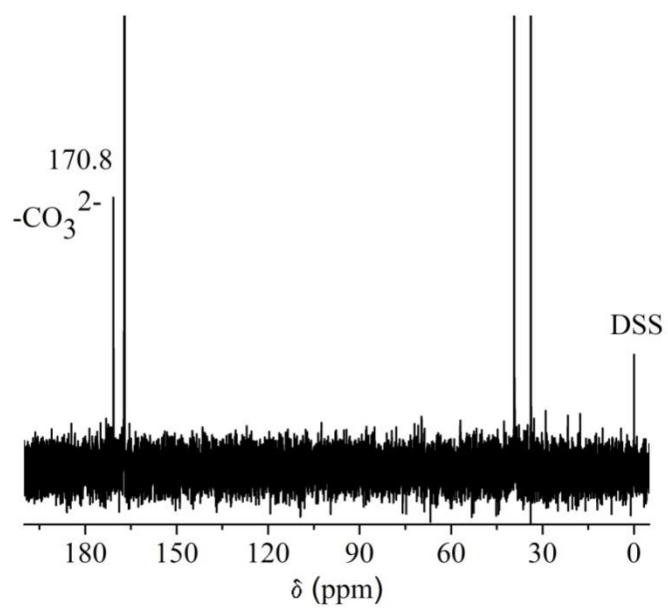

**Fig. S17.** Solution  $^{13}\text{C}$  NMR spectrum of  $\text{K}_2\text{CO}_3$  in dimethylformamide-water.

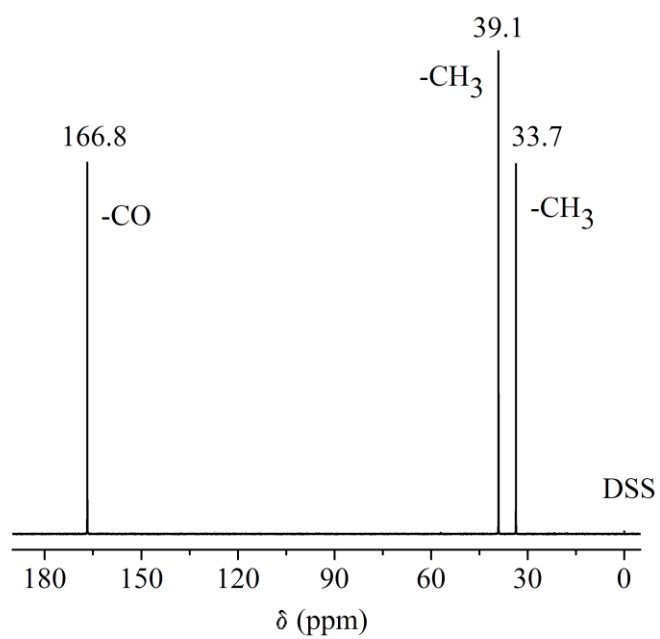

**Fig. S18.** Solution  $^{13}\text{C}$  NMR spectrum of DMF.

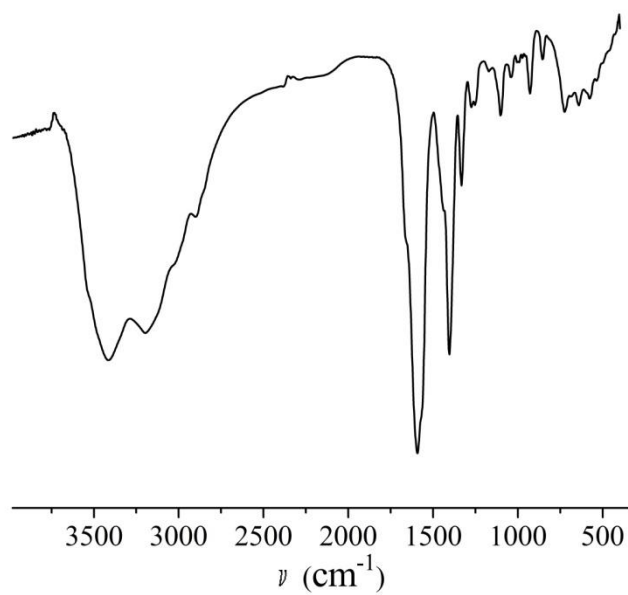

**Fig. S19.** IR spectrum of  $(\text{NH}_4)_5[\text{La}_3(\text{CO}_3)(\text{EDTA})_3(\text{H}_2\text{O})_3] \cdot 12\text{H}_2\text{O}$  (**1**).

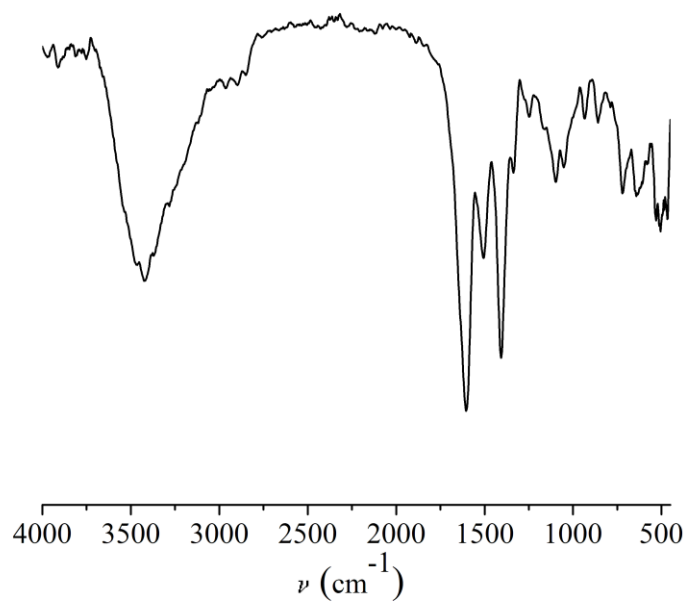

**Fig. S20.** IR spectrum of  $\text{Na}_8[\text{La}_2(\text{CO}_3)_3(\text{EDTA})_2] \cdot 17.5\text{H}_2\text{O}$  (**2**).

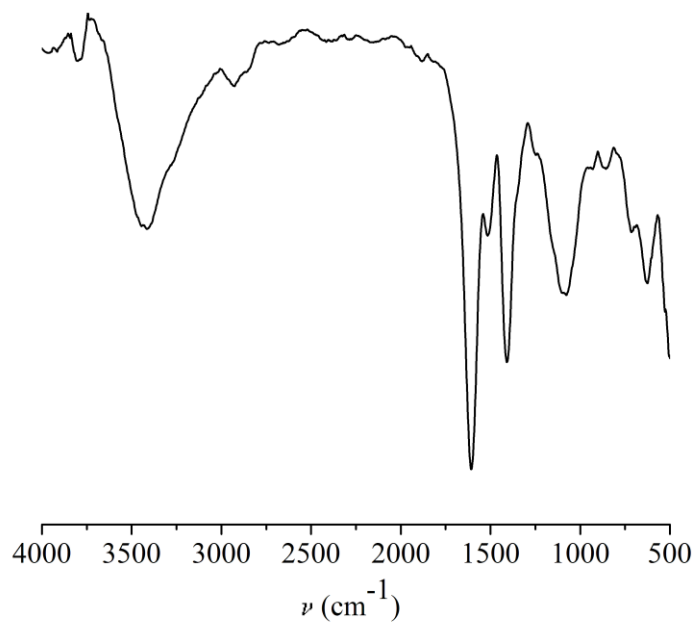

**Fig. S21.** IR spectrum of  $\text{Na}_8[\text{Ce}_2(\text{CO}_3)_3(\text{EDTA})_2] \cdot 17.5\text{H}_2\text{O}$  (**3**).

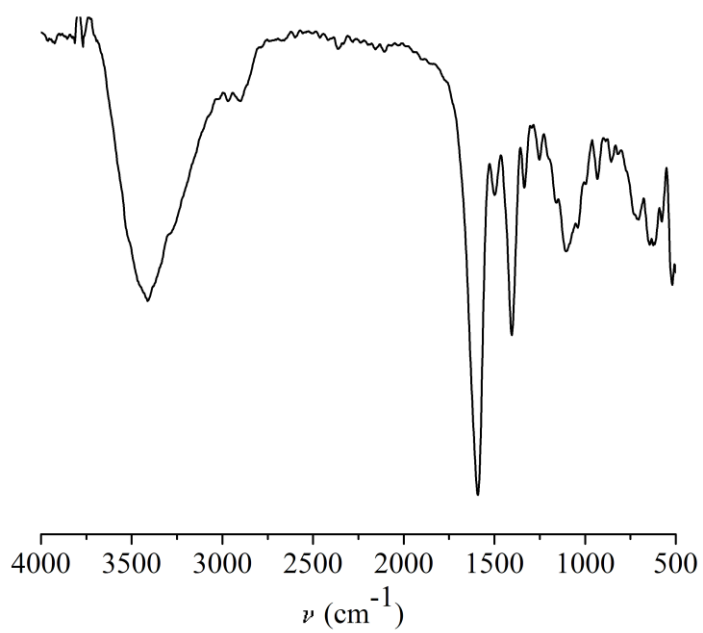

**Fig. S22.** IR spectrum of  $\text{K}_5[\text{La}_3(\text{CO}_3)(\text{EDTA})_3(\text{H}_2\text{O})_3] \cdot 13.5\text{H}_2\text{O}$  (**4**).

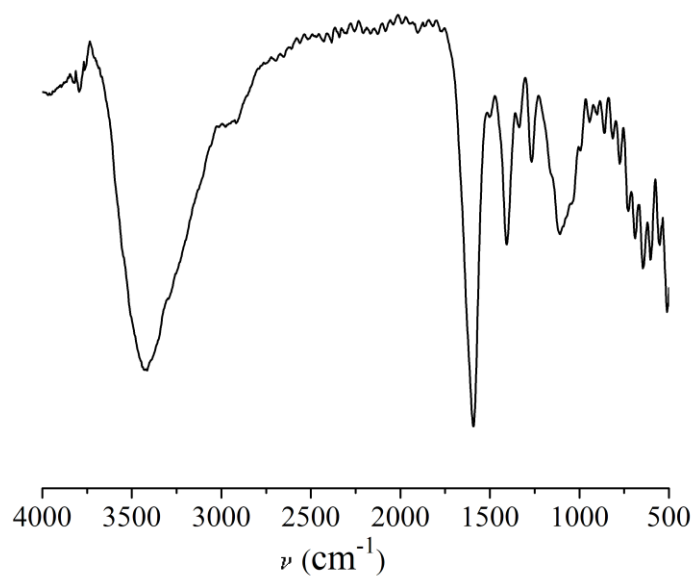

**Fig. S23.** IR spectrum of  $\text{K}_5[\text{Ce}_3(\text{CO}_3)(\text{EDTA})_3(\text{H}_2\text{O})_3] \cdot 13.5\text{H}_2\text{O}$  (**5**).

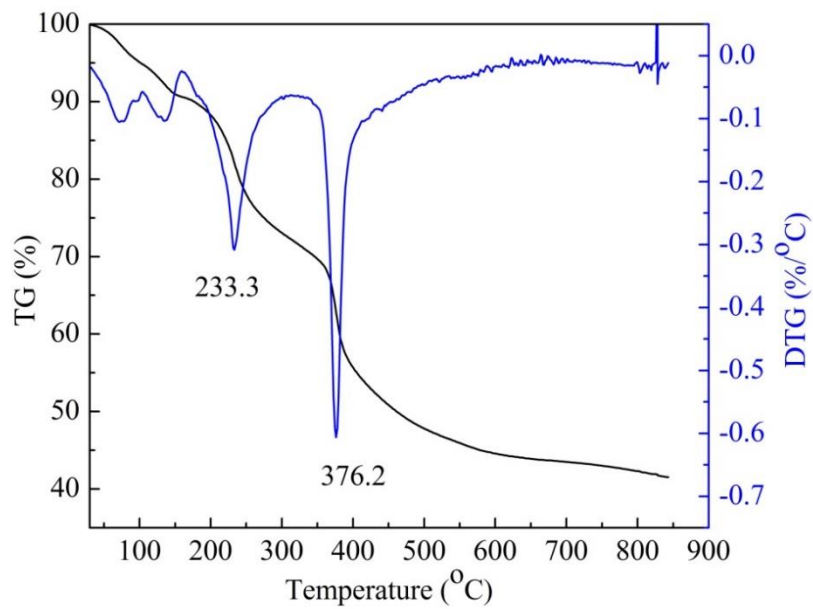

**Fig. S24.** TG-DTG curve of  $(\text{NH}_4)_5[\text{La}_3(\text{CO}_3)(\text{EDTA})_3(\text{H}_2\text{O})_3] \cdot 12\text{H}_2\text{O}$  (**1**).

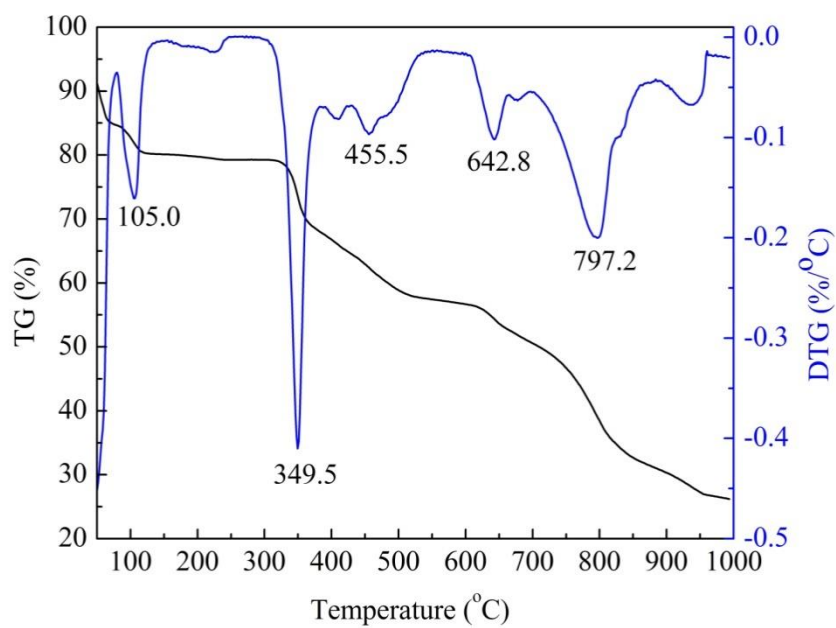

**Fig. S25.** TG-DTG curve of  $\text{Na}_8[\text{La}_2(\text{CO}_3)_3(\text{EDTA})_2] \cdot 17.5\text{H}_2\text{O}$  (**2**).

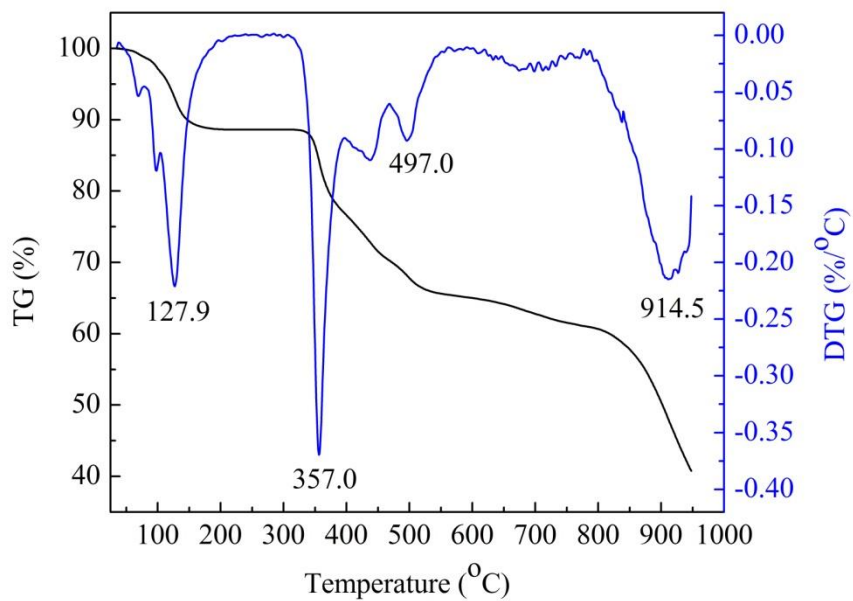

**Fig. S26.** TG-DTG curve of  $\text{Na}_8[\text{Ce}_2(\text{CO}_3)_3(\text{EDTA})_2] \cdot 17.5\text{H}_2\text{O}$  (**3**).

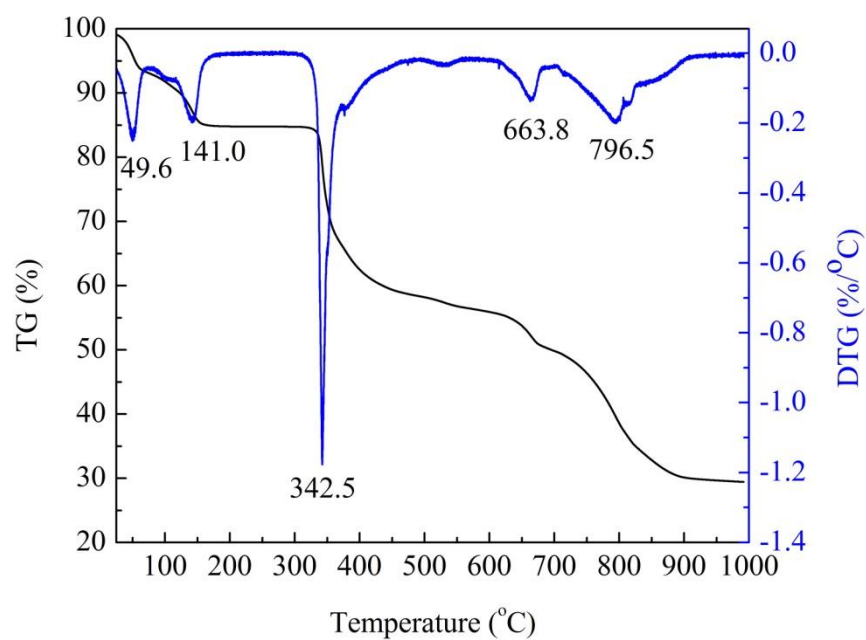

**Fig. S27.** TG-DTG curve of  $\text{K}_5[\text{La}_3(\text{CO}_3)(\text{EDTA})_3(\text{H}_2\text{O})_3] \cdot 13.5\text{H}_2\text{O}$  (**4**).

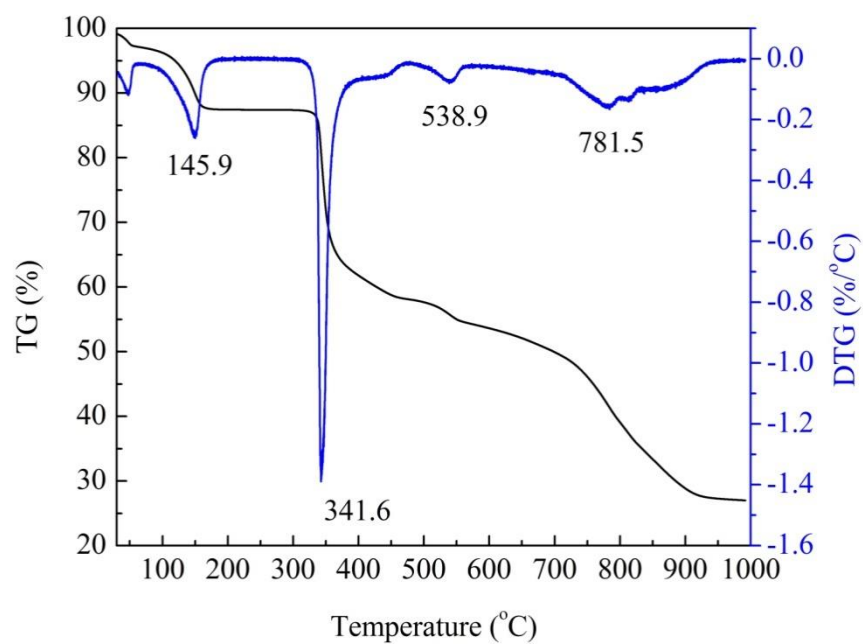

**Fig. S28.** TG-DTG curve of  $\text{K}_5[\text{Ce}_3(\text{CO}_3)(\text{EDTA})_3(\text{H}_2\text{O})_3] \cdot 13.5\text{H}_2\text{O}$  (**5**).



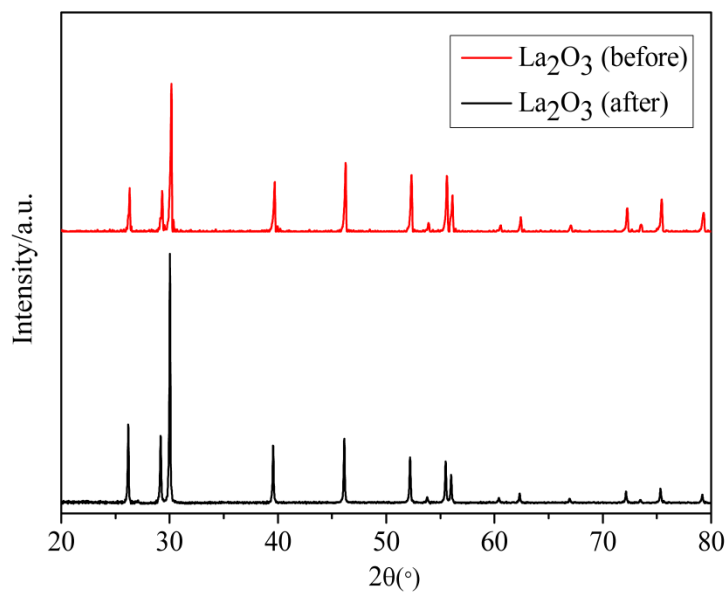

**Fig. S29.** The X-ray diffraction patterns of the conventional bulk  $\text{La}_2\text{O}_3$  (before and after catalytic reactions).

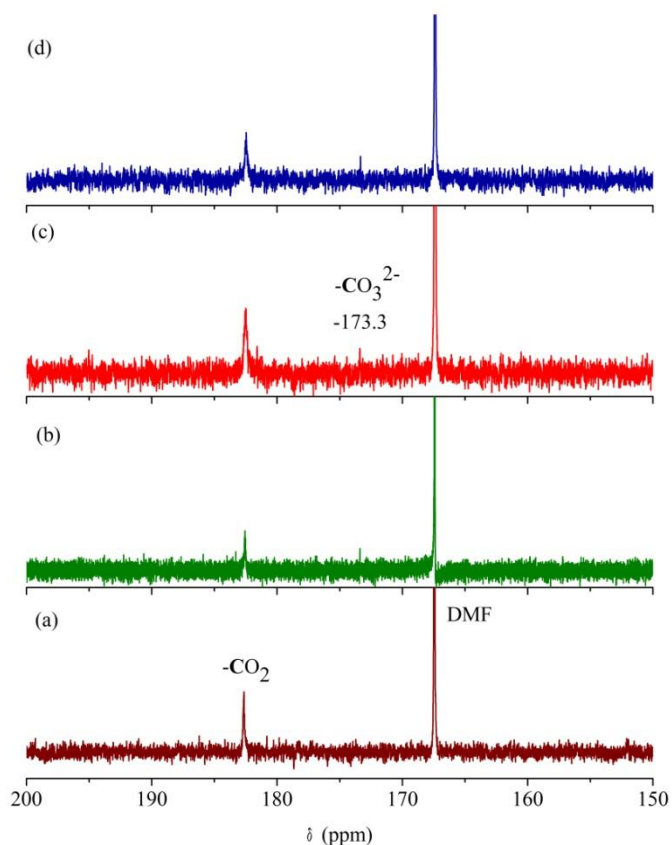

**Fig. S30.** Reaction of  $\text{K}[\text{La}(\text{EDTA})(\text{H}_2\text{O})] \cdot 5\text{H}_2\text{O}$  with atmospheric  $\text{CO}_2$  monitored by  $^{13}\text{C}$  NMR. (a) The spectrum of the sample was recorded after 12 hours. (b) The spectrum of the sample was recorded after 1 day. (c) The spectrum of the sample was recorded after 2 days. (d) The spectrum of the sample was recorded after 4 days.

**Table S1.** Crystal data and structure refinements for **1 ~ 5**.

| Compounds                                   | <b>1</b>                         | <b>2</b>                          | <b>3</b>                            | <b>4</b>                         | <b>5</b>                           |
|---------------------------------------------|----------------------------------|-----------------------------------|-------------------------------------|----------------------------------|------------------------------------|
| Chemical formula                            | $C_{31}H_{78.5}La_3N_{11}O_{42}$ | $C_{23}H_{38}La_2Na_8N_4O_{42.5}$ | $C_{23}H_{41.5}Ce_2N_4Na_8O_{42.5}$ | $C_{31}H_{54}K_5La_3N_6O_{43.5}$ | $C_{31}H_{60.5}Ce_3K_5N_6O_{43.5}$ |
| Formula weight                              | 1694.27                          | 1512.31                           | 1518.26                             | 1819.03                          | 1829.21                            |
| Crystal system                              | Triclinic                        | Triclinic                         | Triclinic                           | Monoclinic                       | Monoclinic                         |
| $a/\text{\AA}$                              | 13.8336(5)                       | 12.4288(8)                        | 12.416(2)                           | 18.3281(1)                       | 18.3813(7)                         |
| $b/\text{\AA}$                              | 17.2510(5)                       | 14.3340(1)                        | 14.310(2)                           | 15.3082(6)                       | 15.2765(6)                         |
| $c/\text{\AA}$                              | 27.2896(7)                       | 16.0464(1)                        | 16.017(3)                           | 23.6676(1)                       | 23.6607(9)                         |
| $\alpha/^\circ$                             | 94.969(2)                        | 73.795(6)                         | 73.825(1)                           | 90                               | 90                                 |
| $\beta/^\circ$                              | 97.482(2)                        | 85.301(5)                         | 85.236(1)                           | 104.899(5)                       | 104.641(4)                         |
| $\gamma/^\circ$                             | 99.709(3)                        | 82.669(5)                         | 82.697(1)                           | 90                               | 90                                 |
| Unit cell volume/ $\text{\AA}^3$            | 6325.1(3)                        | 2719.5(3)                         | 2707.5(8)                           | 6417.2(5)                        | 6428.2(4)                          |
| Temperature/K                               |                                  |                                   | 173                                 |                                  |                                    |
| Space group                                 | $P\bar{1}$                       | $P\bar{1}$                        | $P\bar{1}$                          | $P2_1/n$                         | $P2_1/n$                           |
| No. of formula units per unit cell, $Z$     | 4                                | 2                                 | 2                                   | 4                                | 4                                  |
| No. of reflections measured                 | 65391                            | 24018                             | 25042                               | 35831                            | 36008                              |
| No. of independent reflections              | 29117                            | 12373                             | 13550                               | 14603                            | 14908                              |
| $R_{int}$                                   | 0.0573                           | 0.0611                            | 0.1065                              | 0.0695                           | 0.0612                             |
| Final $R_I$ values ( $I > 2\sigma(I)$ )     | 0.0501                           | 0.0531                            | 0.0800                              | 0.0665                           | 0.0614                             |
| Final $wR(F^2)$ values ( $I > 2\sigma(I)$ ) | 0.0978                           | 0.1086                            | 0.1192                              | 0.1290                           | 0.1091                             |
| Final $R_I$ values (all data)               | 0.0725                           | 0.0737                            | 0.1416                              | 0.0993                           | 0.0831                             |
| Final $wR(F^2)$ values (all data)           | 0.1066                           | 0.1217                            | 0.1477                              | 0.1438                           | 0.1169                             |
| Goodness of fit on $F^2$                    | 1.024                            | 1.020                             | 0.974                               | 1.032                            | 1.111                              |

**Table S2.** Selected bond lengths for **1** ~ **5** and K[La(EDTA)(H<sub>2</sub>O)<sub>3</sub>] 5H<sub>2</sub>O, {[La(EDTA)(H<sub>2</sub>O)]<sub>2</sub>}<sub>n</sub>, [La(EDTA)(H<sub>2</sub>O)<sub>3</sub>] 5H<sub>2</sub>O, Na[Ce(EDTA)(H<sub>2</sub>O)<sub>3</sub>] 5H<sub>2</sub>O, N<sub>2</sub>H<sub>5</sub>[Ce(edta)(H<sub>2</sub>O)<sub>3</sub>] 4H<sub>2</sub>O, [La(CO<sub>3</sub>)(OH)]<sub>n</sub>, La(CO<sub>3</sub>)(OH), LaCl(CO<sub>3</sub>) 3H<sub>2</sub>O, Na<sub>12n</sub>[La(edta)CO<sub>3</sub>]<sub>4n</sub> 8nNaCl 4nH<sub>2</sub>O, Na<sub>8</sub>[(CO<sub>3</sub>)<sub>3</sub>Ce]<sub>2</sub>(μ-η<sup>2</sup>-η<sup>2</sup>-O<sub>2</sub>)<sub>2</sub> ·12H<sub>2</sub>O.

| Compound                                                                                                                                                             | Ln-O-carbonate(av) | Ln-Oβ-carboxy(av) | Ln-N(av) |
|----------------------------------------------------------------------------------------------------------------------------------------------------------------------|--------------------|-------------------|----------|
| <b>1</b>                                                                                                                                                             | 2.557(4)           | 2.579(4)          | 2.771(4) |
| <b>2</b>                                                                                                                                                             | 2.581(3)           | 2.572(4)          | 2.785(4) |
| <b>3</b>                                                                                                                                                             | 2.566(6)           | 2.553(6)          | 2.764(7) |
| <b>4</b>                                                                                                                                                             | 2.576(5)           | 2.573(5)          | 2.766(6) |
| <b>5</b>                                                                                                                                                             | 2.562(5)           | 2.557(4)          | 2.750(5) |
| K[La(EDTA)(H <sub>2</sub> O) <sub>3</sub> ] 5H <sub>2</sub> O <sup>1</sup>                                                                                           |                    | 2.507(6)          | 2.755(6) |
| {[La(EDTA)(H <sub>2</sub> O)] <sub>2</sub> } <sub>n</sub> <sup>2</sup>                                                                                               |                    | 2.555(3)          | 2.848(3) |
| [La(EDTA)(H <sub>2</sub> O) <sub>3</sub> ] 5H <sub>2</sub> O <sup>3</sup>                                                                                            |                    | 2.507(6)          | 2.755(6) |
| Na[Ce(EDTA)(H <sub>2</sub> O) <sub>3</sub> ] 5H <sub>2</sub> O <sup>4</sup>                                                                                          |                    | 2.49(2)           | 2.71(2)  |
| N <sub>2</sub> H <sub>5</sub> [Ce(edta)(H <sub>2</sub> O) <sub>3</sub> ] 4H <sub>2</sub> O <sup>5</sup>                                                              |                    | 2.471(3)          | 2.730(3) |
| [La(CO <sub>3</sub> )(OH)] <sub>n</sub> <sup>6</sup>                                                                                                                 | 2.648(7)           |                   |          |
| La(CO <sub>3</sub> )(OH) <sup>7</sup>                                                                                                                                | 2.680 (5)          |                   |          |
| LaCl(CO <sub>3</sub> ) 3H <sub>2</sub> O <sup>8</sup>                                                                                                                | 2.612(2)           |                   |          |
| Na <sub>12n</sub> [La(edta)CO <sub>3</sub> ] <sub>4n</sub> 8nNaCl 4nH <sub>2</sub> O <sup>9</sup>                                                                    | 2.630(7)           |                   | 2.829(7) |
| Na <sub>8</sub> [(CO <sub>3</sub> ) <sub>3</sub> Ce] <sub>2</sub> (μ-η <sup>2</sup> -η <sup>2</sup> -O <sub>2</sub> ) <sub>2</sub> ·12H <sub>2</sub> O <sup>10</sup> | 2.417(2)           |                   |          |

**Table S3.** Comparisons of C–O bond lengths in complexes **1** ~ **5** and [La(CO<sub>3</sub>)(OH)]<sub>n</sub>, La(CO<sub>3</sub>)(OH), LaCl(CO<sub>3</sub>) 3H<sub>2</sub>O, Na<sub>12n</sub>[La(edta)CO<sub>3</sub>]<sub>4n</sub> 8nNaCl 4nH<sub>2</sub>O, Na<sub>8</sub>[(CO<sub>3</sub>)<sub>3</sub>Ce]<sub>2</sub>(μ-η<sup>2</sup>-η<sup>2</sup>-O<sub>2</sub>)<sub>2</sub> ·12H<sub>2</sub>O, {[La<sub>2</sub>(HL)<sub>2</sub>(H<sub>2</sub>O)<sub>2</sub>(CO<sub>3</sub>)](H<sub>2</sub>O)<sub>7</sub>}<sub>∞</sub>, {[Ce<sub>2</sub>(CO<sub>3</sub>)(ox)<sub>2</sub>(H<sub>2</sub>O)<sub>2</sub>] 3H<sub>2</sub>O}<sub>n</sub>, K<sub>2</sub>CO<sub>3</sub>, free CO<sub>2</sub>.

| Compound                                                                                                                                                             | C–O-bridging                 | C–O-unbridging                                               | C–O-normal |
|----------------------------------------------------------------------------------------------------------------------------------------------------------------------|------------------------------|--------------------------------------------------------------|------------|
| <b>1</b>                                                                                                                                                             | 1.315(6), 1.282(6), 1.275(6) |                                                              |            |
| <b>2</b>                                                                                                                                                             | 1.309(6), 1.280(6), 1.273(6) | 1.297(6), 1.302(6), 1.315(7)<br>1.272(6), 1.250(7), 1.293(6) |            |
| <b>3</b>                                                                                                                                                             | 1.293(9), 1.286(1), 1.278(1) | 1.293(9), 1.304(9), 1.300(1)<br>1.278(1), 1.277(1), 1.294(9) |            |
| <b>4</b>                                                                                                                                                             | 1.303(8), 1.280(9), 1.272(8) |                                                              |            |
| <b>5</b>                                                                                                                                                             | 1.301(7), 1.298(8), 1.265(8) |                                                              |            |
| [La(CO <sub>3</sub> )(OH)] <sub>n</sub> <sup>6</sup>                                                                                                                 | 1.308(2), 1.291(1), 1.291(1) |                                                              |            |
| La(CO <sub>3</sub> )(OH) <sup>7</sup>                                                                                                                                | 1.265(5) – 1.294(3)          |                                                              |            |
| LaCl(CO <sub>3</sub> ) 3H <sub>2</sub> O <sup>8</sup>                                                                                                                | 1.277(3), 1.278(3), 1.284(4) |                                                              |            |
| Na <sub>12n</sub> [La(edta)CO <sub>3</sub> ] <sub>4n</sub> 8nNaCl 4nH <sub>2</sub> O <sup>9</sup>                                                                    | 1.270(8), 1.270(8), 1.310(1) |                                                              |            |
| Na <sub>8</sub> [(CO <sub>3</sub> ) <sub>3</sub> Ce] <sub>2</sub> (μ-η <sup>2</sup> -η <sup>2</sup> -O <sub>2</sub> ) <sub>2</sub> ·12H <sub>2</sub> O <sup>10</sup> |                              | 1.260(3), 1.294(3), 1.308(3)                                 |            |
| {[La <sub>2</sub> (HL) <sub>2</sub> (H <sub>2</sub> O) <sub>2</sub> (CO <sub>3</sub> )](H <sub>2</sub> O) <sub>7</sub> } <sub>∞</sub> <sup>11</sup>                  | 1.270(8), 1.270(8), 1.284(1) |                                                              |            |
| {[Ce <sub>2</sub> (CO <sub>3</sub> )(ox) <sub>2</sub> (H <sub>2</sub> O) <sub>2</sub> ] 3H <sub>2</sub> O} <sub>n</sub> <sup>12</sup>                                | 1.269(9), 1.287(9), 1.293(9) |                                                              |            |
| K <sub>2</sub> CO <sub>3</sub> <sup>13</sup>                                                                                                                         |                              |                                                              | 1.250      |
| free CO <sub>2</sub> <sup>14</sup>                                                                                                                                   |                              |                                                              | 1.160      |

**Table S4.** The coordination number and the selected average bond length for **1** ~ **5** and other lanthanide carbonate complexes (O<sub>c</sub> are the coordinated O atoms by carbonate).

| Compound                                                                                                                               | Coordination number | Ln-O <sub>c</sub> (av) | C-O <sub>c</sub> (av) |
|----------------------------------------------------------------------------------------------------------------------------------------|---------------------|------------------------|-----------------------|
| <b>1</b>                                                                                                                               | 10                  | 2.557(4)               | 1.290(6)              |
| <b>2</b>                                                                                                                               | 10                  | 2.581(3)               | 1.287(6)              |
| <b>3</b>                                                                                                                               | 10                  | 2.566(6)               | 1.286(6)              |
| <b>4</b>                                                                                                                               | 10                  | 2.576(5)               | 1.285(8)              |
| <b>5</b>                                                                                                                               | 10                  | 2.562(5)               | 1.288(8)              |
| LaCl[CO <sub>3</sub> ]·3H <sub>2</sub> O <sup>8</sup>                                                                                  | 10                  | 2.612(2)               | 1.280(3)              |
| Na <sub>12n</sub> [La(edta)CO <sub>3</sub> ] <sub>4n</sub> ·8nNaCl·4nH <sub>2</sub> O <sup>9</sup>                                     | 10                  | 2.630(7)               | 1.283(6)              |
| [Eu <sub>2</sub> (CO <sub>3</sub> )(ox) <sub>2</sub> (H <sub>2</sub> O) <sub>2</sub> ]·4H <sub>2</sub> O <sup>15</sup>                 | 9                   | 2.493(5)               | 1.280(9)              |
| [C(NH <sub>2</sub> ) <sub>3</sub> ][Pr(CO <sub>3</sub> ) <sub>4</sub> (H <sub>2</sub> O)]·2H <sub>2</sub> O <sup>16</sup>              | 9                   | 2.502(30)              | 1.299(14)             |
| [C(NH <sub>2</sub> ) <sub>3</sub> ][Lu(CO <sub>3</sub> ) <sub>4</sub> ]·2H <sub>2</sub> O <sup>16</sup>                                | 8                   | 2.311(12)              | 1.304(12)             |
| [C(NH <sub>2</sub> ) <sub>3</sub> ] <sub>3</sub> [Er(EDTA)(CO <sub>3</sub> )]·H <sub>2</sub> O <sup>17</sup>                           | 8                   | 2.329(2)               | 1.299(5)              |
| [C(NH <sub>2</sub> ) <sub>6</sub> ][Eu <sub>2</sub> (L) <sub>2</sub> (CO <sub>3</sub> ) <sub>2</sub> ]·8H <sub>2</sub> O <sup>18</sup> | 8                   | 2.432(4)               | 1.290(9)              |

**Table S5.**  $^{13}\text{C}$  NMR spectral data (in ppm) of complexes **1**, **2**, **4**,  $\text{K}_2\text{CO}_3$ ,  $\text{K}_3\text{Hcit}$ ,  $\text{K}_4\text{EDTA}$ ,  $\text{K}_2\text{Hmal}$ ,  $\text{K}[\text{La}(\text{EDTA})(\text{H}_2\text{O})_3] \cdot 5\text{H}_2\text{O}$ .

| Compound                                           | $\text{CO}_3^{2-}$ | $-\text{CH}_2\text{N}$    | $-\text{NCH}_2\text{CO}_2$ | $-\text{CO}_2$                |
|----------------------------------------------------|--------------------|---------------------------|----------------------------|-------------------------------|
| <b>1</b>                                           | 173.5(2.9)         | 54.3(0.6),<br>57.3(3.6)   | 60.7(0.6),<br>64.5(4.4)    | 182.9(4.4)                    |
| <b>2</b>                                           | 171.6(1.0)         | 55.6(1.9)                 | 63.0(2.9)                  | 182.6(4.1)                    |
| <b>4</b>                                           | 171.0(0.4)         | 56.1(2.4)                 | 63.4(3.3)                  | 182.7(4.2)                    |
| $\text{CO}_3^{2-}$                                 | 170.6              |                           |                            |                               |
| $[\text{EDTA}]^{4-}$                               |                    | 53.7                      | 60.1                       | 178.5                         |
| $[\text{La}(\text{EDTA})(\text{H}_2\text{O})_3]^-$ |                    | 57.2(3.5)                 | 64.4(4.3)                  | 183.0(4.5)                    |
| Solid                                              |                    |                           |                            |                               |
| <b>1</b>                                           |                    | 58.8, 52.4                | 63.6, 61.3                 | 183.0, 180.8,<br>177.2        |
| <b>2</b>                                           | 171.1,<br>169.8    | 59.0, 55.5,<br>52.9, 51.9 | 63.6, 62.7,<br>61.9, 60.6  | 181.3, 180.7,<br>179.4, 178.5 |
| <b>4</b>                                           | 170.2              | 58.5, 57.4,<br>55.1, 51.7 | 68.2, 64.6,<br>62.9, 60.1  | 184.5, 182.1,<br>180.3, 177.7 |

**Table S6.** Comparisons of catalytic activity of the thermal decomposition products (T = 650 °C and 750 °C) from **1**, **2**, reported La<sub>2</sub>O<sub>3</sub> and La<sub>2</sub>O<sub>2</sub>CO<sub>3</sub> towards the OCM reaction.

| Sample            | T/ °C | Conv CH <sub>4</sub> /% | Sel C <sub>2</sub> /% | Yield C <sub>2</sub> /% | Sample                                                                   | T/ °C | Conv CH <sub>4</sub> /% | Sel C <sub>2</sub> /% | Yield C <sub>2</sub> /% |
|-------------------|-------|-------------------------|-----------------------|-------------------------|--------------------------------------------------------------------------|-------|-------------------------|-----------------------|-------------------------|
| <b>1</b> (650 °C) | 550   | 17.8                    | 20.6                  | 3.7                     | La <sub>2</sub> O <sub>3</sub> <sup>19</sup><br>(650 °C)                 | 550   | 23.2                    | 34.6                  | 8.0                     |
|                   | 600   | 26.4                    | 24.6                  | 6.5                     |                                                                          | 600   | 26.5                    | 42.0                  | 11.1                    |
|                   | 650   | 38.2                    | 29.1                  | 11.1                    |                                                                          | 650   | 28.1                    | 44.2                  | 12.4                    |
|                   | 700   | 41.5                    | 32.2                  | 13.4                    |                                                                          | 700   | 27.2                    | 45.7                  | 12.4                    |
|                   | 750   | 43.1                    | 32.5                  | 14.0                    |                                                                          | 750   | 29.6                    | 45.4                  | 13.4                    |
| <b>1</b> (750 °C) | 550   | 28.5                    | 43.7                  | 12.5                    | La <sub>2</sub> O <sub>2</sub> CO <sub>3</sub> <sup>20</sup><br>(650 °C) | 550   | 0.0                     | 0.0                   | 0.0                     |
|                   | 600   | 29.3                    | 46.1                  | 13.5                    |                                                                          | 600   | 13.1                    | 28.4                  | 3.7                     |
|                   | 650   | 29.8                    | 49.2                  | 14.6                    |                                                                          | 650   | 17.4                    | 42.4                  | 7.4                     |
|                   | 700   | 31.6                    | 46.0                  | 14.5                    |                                                                          | 700   | 23.0                    | 45.8                  | 10.5                    |
|                   | 750   | 31.1                    | 45.7                  | 14.2                    |                                                                          | 750   | 29.6                    | 46.6                  | 13.8                    |
| <b>2</b> (650 °C) | 550   | 0                       | 0                     | 0                       |                                                                          |       |                         |                       |                         |
|                   | 600   | 1.7                     | 0                     | 0                       |                                                                          |       |                         |                       |                         |
|                   | 650   | 3.1                     | 49.1                  | 1.5                     |                                                                          |       |                         |                       |                         |
|                   | 700   | 4.5                     | 57.9                  | 2.6                     |                                                                          |       |                         |                       |                         |
|                   | 750   | 8.4                     | 63.6                  | 5.3                     |                                                                          |       |                         |                       |                         |

**Table S7.** Catalytic Performances of **1**, **2** and La<sub>2</sub>O<sub>2</sub>CO<sub>3</sub>-H, La<sub>2</sub>O<sub>2</sub>CO<sub>3</sub>-P, La<sub>2</sub>O<sub>3</sub>, BaCO<sub>3</sub>/LaOBr, LaAlO<sub>3</sub>\_C, La<sub>2</sub>O<sub>2</sub>CO<sub>3</sub>, La<sub>2</sub>O<sub>2</sub>SO<sub>4</sub>, La<sub>2</sub>O<sub>3</sub> for OCM.

| Sample                                                          | T/ °C | Conv CH <sub>4</sub> /% | Sel C <sub>2</sub> /% | Yield C <sub>2</sub> /% |
|-----------------------------------------------------------------|-------|-------------------------|-----------------------|-------------------------|
| <b>1</b>                                                        | 750   | 43.1                    | 32.5                  | 14.0                    |
| <b>2</b>                                                        | 750   | 8.4                     | 63.6                  | 5.3                     |
| La <sub>2</sub> O <sub>2</sub> CO <sub>3</sub> -H <sup>21</sup> | 500   | 30.5                    | 48.6                  | 14.8                    |
| La <sub>2</sub> O <sub>2</sub> CO <sub>3</sub> -P <sup>21</sup> | 500   | 26.8                    | 29.1                  | 7.8                     |
| La <sub>2</sub> O <sub>3</sub> <sup>22</sup>                    | 750   | 24.1                    | 28.1                  | 6.8                     |
| BaCO <sub>3</sub> /LaOBr <sup>22</sup>                          | 750   | 29.1                    | 46.8                  | 13.6                    |
| LaAlO <sub>3</sub> _C <sup>23</sup>                             | 750   | 24                      | 50                    |                         |
| La <sub>2</sub> O <sub>2</sub> CO <sub>3</sub> <sup>24</sup>    | 750   | 30.1                    | 46.6                  |                         |
| La <sub>2</sub> O <sub>2</sub> SO <sub>4</sub> <sup>24</sup>    | 750   | 26.5                    | 43.2                  |                         |
| La <sub>2</sub> O <sub>3</sub> <sup>25</sup>                    | 700   | 30                      | 47                    |                         |

## References

1. J. L. Hoard, Byungkook Lee and M. D. Lind, *J. Am. Chem. Soc.*, 1965, **87**, 1612–1613.
2. D. B. Xiong, H. H. Chen, X. X. Yang and J. T. Zhao, *Inorg. Chim. Acta*, 2007, **360**, 1616–1620.
3. J. L. Hoard, B. Lee and M. D. Lind, *J. Am. Chem. Soc.*, 1965, **87**, 1612–1613.
4. M. G. B. Drew, M. R. S. Foreman, M. J. Hudson and K. F. Kennedy, *Inorg. Chim. Acta*, 2004, **357**, 4102–4112.
5. R. Ragul and B. N. Sivasankar, *J. Chem. Crystallogr.*, 2011, **41**, 1273–1279.
6. K. Michiba, T. Tahara, I. Nakai, R. Miyawaki and S. Matsubara, *Z. Kristall.*, 2011, **226**, 518–530.
7. M. Haemmer and H. A. Hoeppe, *Z.Naturforsch.(B)*, 2019, **74**, 59–70.
8. O. Reckeweg, F. Lissner, B. Blaschkowski, A. Schulz and T. Schleid, *Z.Naturforsch.(B)*, 2018, **73**, 661–667.
9. S. Y. Wang, S. Gao, J. W. Dai, Y. R. Shi, X. Dong, W. Z. Weng and Z. H. Zhou, *Dalton Trans.*, 2019, **48**, 2959–2966.
10. L. E. Sweet, J. F. Corbey, F. Gendron, J. Autschbach, B. K. McNamara, K. L. Ziegelgruber, L. M. Arrigo, S. M. Peper and J. M. Schwantes, *Inorg. Chem.*, 2017, **56**, 791–801.
11. J. Zhao, L. S. Long, R. B. Huang and L. S. Zheng, *Dalton Trans.*, 2008, DOI: 10.1039/b806615a, 4714–4716.
12. Q. Tang, Y. L. Yang, N. Zhang, Z. Liu, S. H. Zhang, F. S. Tang, J. Y. Hu, Y. Z. Zheng and F. P. Liang, *Inorg. Chem.*, 2018, **57**, 9020–9027.
13. H. Y. Becht and R. Struikmans, *Acta Cryst*, 1976, **32**, 3344–3346.
14. V. S. Mastyukov and J. E. Boggs, *J. Mol. Struct.*, 1993, **300**, 141–147.
15. Q. Tang, Y. Liu, S. Liu, D. He, J. Miao, X. Wang, G. Yang, Z. Shi and Z. Zheng, *J. Am. Chem. Soc.*, 2014, **136**, 12444–12449.
16. R. Janicki, P. Starynowicz and A. Mondry, *Eur. J. Inorg. Chem.*, 2011, **2011**, 3601–3616.
17. R. Janicki and A. Mondry, *Inorg. Chem. Front.*, 2019, **6**, 153–163.
18. J. Galezowska, R. Janicki, H. Kozłowski, A. Mondry, P. Mlynarz and L. Szyrwił, *Eur. J. Inorg. Chem.*, 2010, 2010, 1696–1702.
19. M. L. Chen, S. Gao and Z. H. Zhou, *Dalton Trans.*, 2012, **41**, 1202–1209.
20. M. L. Chen, Y. H. Hou, W. S. Xia, W. Z. Weng, Z. X. Cao, Z. H. Zhou and H. L. Wan, *Dalton Trans.*, 2014, **43**, 8690–8697.
21. Y. H. Hou, W. C. Han, W. S. Xia and H. L. Wan, *ACS Catal.*, 2015, **5**, 1663–1674.
22. C. T. Au, H. He, S. Y. Lai and C. F. Ng, *J. Catal.*, 1996, **163**, 399–408.
23. G. Lee, I. Kim, I. Yang, J.-M. Ha, H. B. Na and J. C. Jung, *Appl. Surf. Sci.*, 2018, **429**, 55–61.
24. Y. C. Guo, Y. H. Hou, X. Dong, Y. C. Yang, W. S. Xia, W. Z. Weng and Z. H. Zhou, *Inorg. Chim. Acta*, 2015, **434**, 221–229.
25. P. Huang, Y. Zhao, J. Zhang, Y. Zhu and Y. Sun, *Nanoscale*, 2013, **5**, 10844–10848.
